# Supplementary material
Source: PubMed Central journal article supplement (PMC11378322)
Supplement: NIHMS2018061-supplement-1.pdf [file NIHMS2018061-supplement-1.pdf]

## A Supplementary material

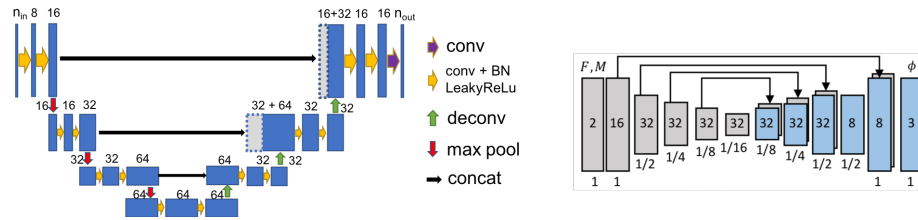

**Fig. 3:** Architectures of the segmentation network (left) and the registration network (right). In the segmentation network, max-pooling is used for down-sampling for which 2-stride convolution is used in the registration network.

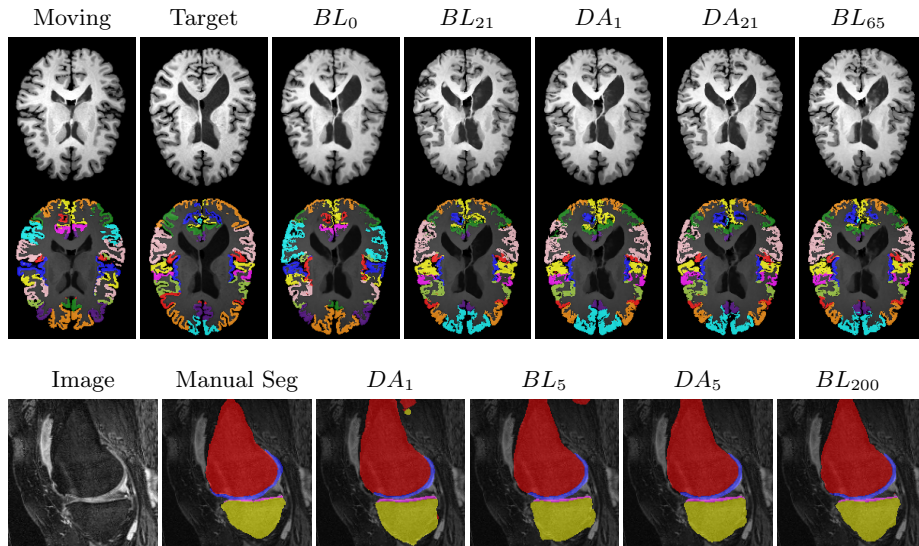

**Fig. 4:** Examples of brain MRI registration (top) and knee MRI segmentation (bottom) results. **Top:** The first two columns are the moving image/segmentation and the target image/segmentation followed by the warped moving images/segmentations by different models. **Bottom left to right:** original image, manual segmentation, and predictions of various models.  $BL_i$  and  $DA_i$  represent the baseline and DA models with  $i$  manual segmentations respectively.
